# Supplementary material
Source: PubMed Central journal article supplement (PMC2880014)
Supplement: supp_123_12_2124__6.pdf [file supp_123_12_2124__6.pdf]

## Supplementary Table 1

*Gene-specific primers used for 3' RACE and 5' RACE.*

### *numr-1* 3'RACE

| Primer     | Sequence (5' to 3')                                 |
|------------|-----------------------------------------------------|
| GSP 1      | GAAACTACAAGTGAACCAATTCAATTC<br>(3 bp to 31 bp)*     |
| GSP 2      | GCTCCTGGAGCAACTGAACAA ATTTTC<br>(49 bp to 74 bp)    |
| Nested GSP | GGGAGAAGTCCGACTCAATTTCAATGTTG<br>(126 bp to 154 bp) |

\*Sequence location of the primers using ATG as nucleotide 1.

### *numr-2* 3'RACE

| Primer             | Sequence (5' to 3')                                         |
|--------------------|-------------------------------------------------------------|
| GSP 1<br>(Exon 1)* | CAGAGATTCTGCTTCTATTTTTGTGATTGC<br>(9 bp to 38 bp)**         |
| GSP 2<br>(Exon 2)  | CCTTCTGCATATTCAGTCCCAACAACATTGCTAGACG<br>(623 bp to 659 bp) |
| GSP 3<br>(Exon 3)  | GCAATGCCGTGGAATACAAATAATCG<br>(685 bp to 710 bp)            |
| GSP 4<br>(Exon 4)  | GTCCAACCATTCAATGCTTCTGAACTTCTG<br>(784 bp to 814 bp)        |

\* Prior to this publication, the predicted coding region for *numr-2* contained five exons (WormBase ver. WS201).

\*\*Sequence location of the primers using the originally predicted ATG as nucleotide 1. The real ATG was subsequently determined to be further upstream.

### *numr-1* and *numr-2* 5'RACE

| Primer     | Sequence (3' to 5')                                   |
|------------|-------------------------------------------------------|
| GSP 1      | GCTTCTTCATTTGATGTCTCTTGTGATGATC<br>(469 bp to 439 bp) |
| GSP 2      | GATCTTGAACGATCAAATCCACGACTTCTG<br>(410 bp to 381 bp)  |
| Nested GSP | CACGTCTTCCACAATGACGACGATGT<br>(373 bp to 348 bp)      |
