# Supplementary material
Source: PubMed Central journal article supplement (PMC2880014)
Supplement: supp_123_12_2124__7.pdf [file supp_123_12_2124__7.pdf]

## Supplementary Table 2

*Primer sequences used for C. elegans qRT-PCR*

| Gene               | Forward (5' to 3')                            | Reverse (3' to 5')                             |
|--------------------|-----------------------------------------------|------------------------------------------------|
| <i>mlc-2</i>       | TTGACAGGAACTGACCCAGAGG<br>(265 bp to 286 bp)* | ATAGCCTTGACCTCATCCTCG<br>(413 bp to 393 bp)    |
| <i>cdr-1</i>       | TCTTCTCTCAATTGGCAACTG<br>(698 bp to 718 bp)   | TTTGGGTAACTTCATGACGA<br>(818 bp to 798 bp)     |
| <i>numr-1/-2**</i> | GGAAGACGAGGAATGGATCATC<br>(682 bp to 703 bp)  | CTGCGTTCAAATGGATGTTGTCTC<br>(830 bp to 807 bp) |
| <i>rpb-12</i>      | CGCCGAAAATGAAATCAAAC<br>(81 bp to 100 bp)     | GGGCGTCGTACACCATCA<br>(184 bp to 167 bp)       |

\*Sequence location of the primers using ATG as nucleotide 1.

\*\* Sequences for the coding regions of *numr-1* and *numr-2* are 100% identical, therefore the *numr*-specific primers will amplify both *numr-1* and *numr-2* cDNAs. For this reason the genes are designated *numr-1/-2*.
