# Supplementary material
Source: PubMed Central journal article supplement (PMC2880014)
Supplement: supp_123_12_2124__8.pdf [file supp_123_12_2124__8.pdf]

**Supplementary Table 3. Primer sequences for GFP and mCherry reporter constructs.**

**PROMOTER TRANSGENES**

*P<sub>numr-1</sub>::mCherry*

| <b>Primer</b>                                                    | <b>Sequence (5' to 3')</b>                                                           |
|------------------------------------------------------------------|--------------------------------------------------------------------------------------|
| Primer A ( <i>numr-1</i> promoter forward)                       | CCGTAACCCGGACTGAGTGCCTGCCTATGTTTTCAAT<br>(-499 bp to -477 bp)                        |
| Primer B ( <i>numr-1</i> promoter reverse with mCherry overhang) | GATGATGGCCATGTTATCCTCCTCGCCCTTGCTCACCATGG-<br>TTGCAGTTGTAGTTTTTCATTTTTTCAGAATGATTTTC |
| Primer C (mCherry forward)                                       | ATGGTGAGCAAGGGCGAGGAGGA                                                              |
| Primer D (mCherry reverse)                                       | CCACTGAGCCTCAAACCCAAACCTTCTTCCG                                                      |
| Primer D' (nested mCherry reverse)                               | ATCTTTCTTGCATCGTGCTCATC                                                              |

*P<sub>numr-1</sub>::GFP*

| <b>Primer</b>                                                | <b>Sequence (5' to 3')</b>                                                          |
|--------------------------------------------------------------|-------------------------------------------------------------------------------------|
| Primer A ( <i>numr-1</i> promoter forward)                   | GGACTGAGTGCCTGCCTATGTTTTCAATCTGATTAG<br>(-490 bp to -455 bp)                        |
| Primer A' (nested <i>numr-1</i> promoter forward)            | GGTCTGAAATCTGGAGAGCG<br>(-454 bp to -434 bp)                                        |
| Primer B ( <i>numr-1</i> promoter reverse with GFP overhang) | GGGACAACCTCCAGTGAAAAGTTCTTCTCCTTTACTCA<br>TGGTTGCAGTTGTAGTTTTTCATTTTTTCAGAATGATTTTC |
| Primer C (GFP forward)                                       | ATGAGTAAAGGAGAAGAAGTTTCTACTGGAGTTGTCCC                                              |
| Primer D (GFP reverse)                                       | CCACTGAGCCTCAAACCCAAACCTTCTTCCG                                                     |
| Primer D' (nested GFP reverse)                               | ATCTTTCTTGCATCGTGCT                                                                 |

*P<sub>numr-2</sub>::GFP*

| <b>Primer</b>                                                | <b>Sequence (5' to 3')</b>                                                       |
|--------------------------------------------------------------|----------------------------------------------------------------------------------|
| Primer A ( <i>numr-2</i> promoter forward)                   | CTGTAAAAATTTGCTCTCCAGATTTTCAGACCCTAATC<br>(-499 bp to -461 bp)                   |
| Primer B ( <i>numr-2</i> promoter reverse with GFP overhang) | GGGACAACCTCCAGTGAAAAGTTCTTCTCCTTTACTCAT-GGTTGCAGTTGTAGTTTTTCATTTTTTCAGAATGATTTTC |

## PROMOTER PRTOEIN FUSION TRANSGENES

*P<sub>numr-1</sub>::NUMR-1-GFP*

| Primer                                                                              | Sequence (5' to 3')                                                        |
|-------------------------------------------------------------------------------------|----------------------------------------------------------------------------|
| Primer A<br>( <i>numr-1</i><br>promoter<br>forward)                                 | GGACTGAGTGCCTGCCTATGTTTTCAATCTGATTAG<br>(-490 bp to -455 bp)               |
| Primer<br>A' (nested<br><i>numr-1</i><br>promoter<br>forward)                       | GGTCTGAAATCTGGAGAGCG<br>(-454 bp to -434 bp)                               |
| Primer B<br>( <i>numr-1</i><br>coding<br>region<br>reverse<br>with GFP<br>overhang) | GGGACAACCTCCAGTGAAAAGTTCTTCTCCTTTACTCA-TTCGACCAAATCTGCGTTCAAATGGATGTTGTCTC |
| Primer C<br>(GFP<br>forward)                                                        | ATGAGTAAAGGAGAAGAAGACTTTTCACTGGAGTTGTCCC                                   |
| Primer D<br>(GFP<br>reverse)                                                        | CCACTGAGCCTCAAACCCAAACCTTCTTCCG                                            |
| Primer<br>D' (nested<br>GFP<br>reverse)                                             | ATCTTTCTTGCATCGTGCT                                                        |

## HEAT SHOCK FACTOR 1 PROMOTER FUSION

*P<sub>hsf-1</sub>::*HSF-1

| Primer                                                              | Sequence (5' to 3')                                                                             |
|---------------------------------------------------------------------|-------------------------------------------------------------------------------------------------|
| Primer A ( <i>hsf-1</i> promoter forward)                           | CGGTAAAAATGGGAAACCCTAAAATTAATGGCAAAG<br>(-1993 bp to -1956 bp)                                  |
| Primer B ( <i>hsf-1</i> promoter reverse with cDNA fusion overhang) | GATTTTGATTCCCTGTTGGCTGCATTTTACGAACTAGCACGCGGTATCTGAAATTATTATATTTAAAATATTAG<br>(36 bp to -48 bp) |
| Primer C (HSF-1 cDNA forward)                                       | ATGCAGCCAACAGGGAATCAAATACAACAAAACCAG                                                            |
| Primer D (HSF-1 cDNA reverse)                                       | AACCAAATTAGGATCCGATGGACTTGGAGTACGAAGA                                                           |

*P<sub>hsf-1</sub>::*HSF-1-mCherry

| Primer                                              | Sequence (5' to 3')                                                 |
|-----------------------------------------------------|---------------------------------------------------------------------|
| Primer A ( <i>hsf-1</i> promoter forward)           | CGGTAAAAATGGGAAACCCTAAAATTAATGGCAAAG<br>(-1993 bp to -1956 bp)      |
| Primer B (HSF-1 cDNA reverse with mCherry overhang) | CATGTTATCCTCCTCGCCCTTGCTCACCATAACCAAA-<br>TTAGGATCCGATGGACTTGGAGTAC |
| Primer C (mCherry forward)                          | ATGGTGAGCAAGGGCGAGGAGGA                                             |
| Primer D (mCherry reverse)                          | CCACTGAGCCTCAAACCCAAACCTTCTTCCG                                     |
| Primer D' (nested mCherry reverse)                  | ATCTTTCTTGCATCGTGCTCATC                                             |

|                                            |                                           |
|--------------------------------------------|-------------------------------------------|
| Primer<br>C (GFP<br>forward)               | ATGAGTAAAGGAGAAGAAGAACTTTTCACTGGAGTTGTCCC |
| Primer<br>D (GFP<br>reverse)               | CCACTGAGCCTCAAACCCAAACCTTCTTCCG           |
| Primer<br>D'<br>(nested<br>GFP<br>reverse) | ATCTTTCTTGCATCGTGCT                       |
