# Supplementary material
Source: PubMed Central journal article supplement (PMC2880014)

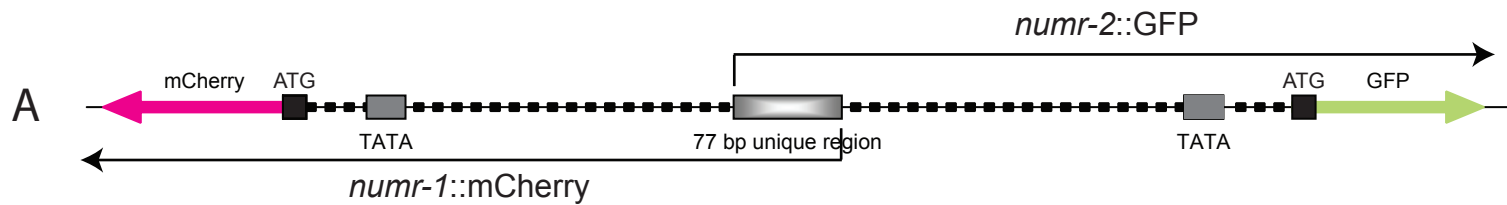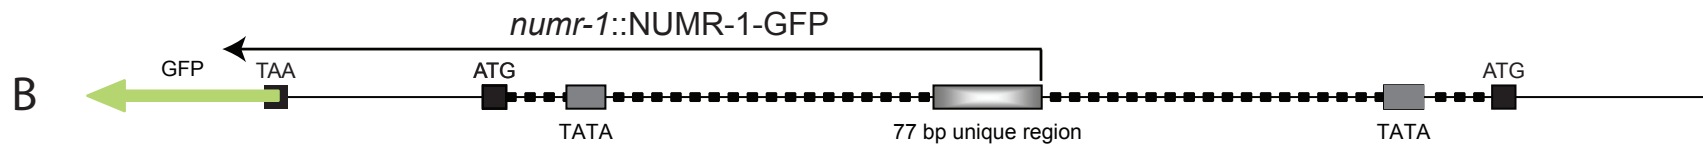

Supplement: supp_123_12_2124__1.pdf [file supp_123_12_2124__1.pdf]

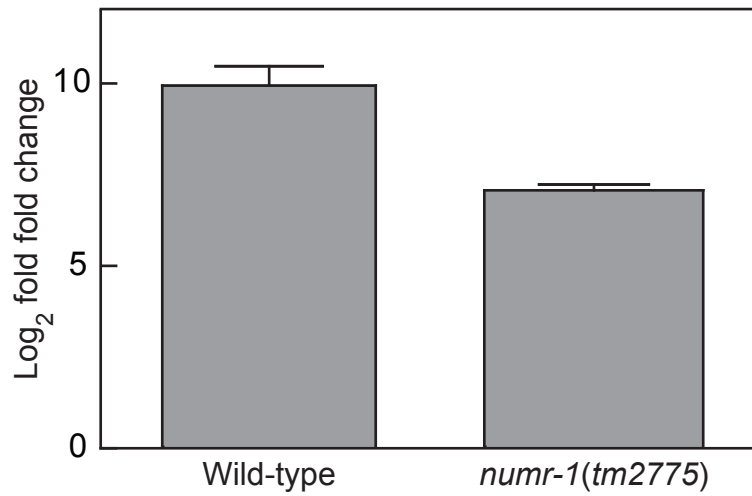

Supplement: supp_123_12_2124__2.pdf [file supp_123_12_2124__2.pdf]

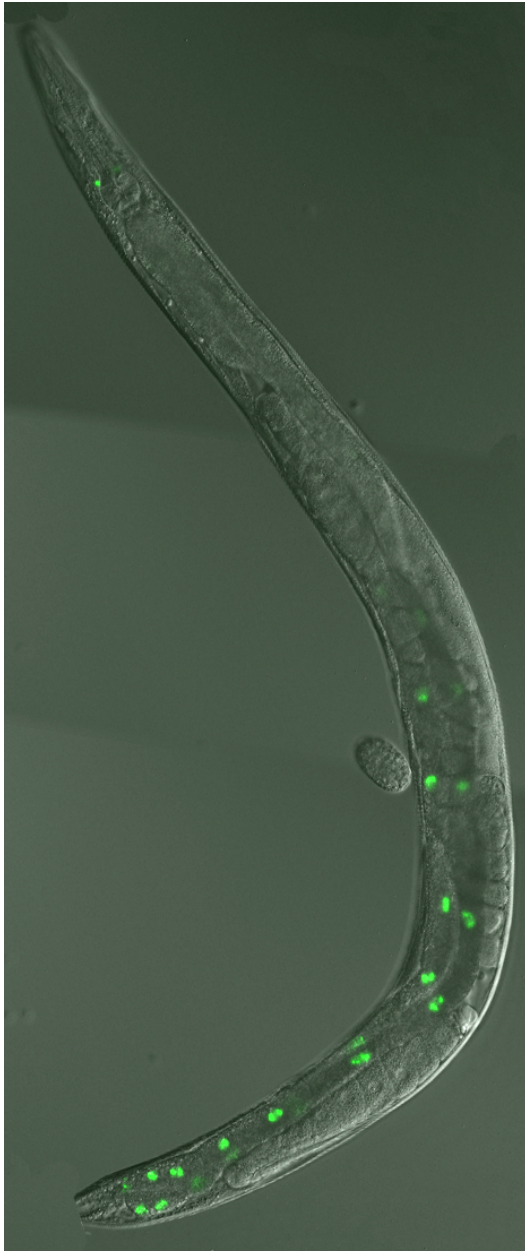

JF88(*mtEx63*)  
2  $\mu$ M silver  
24 hour exposure

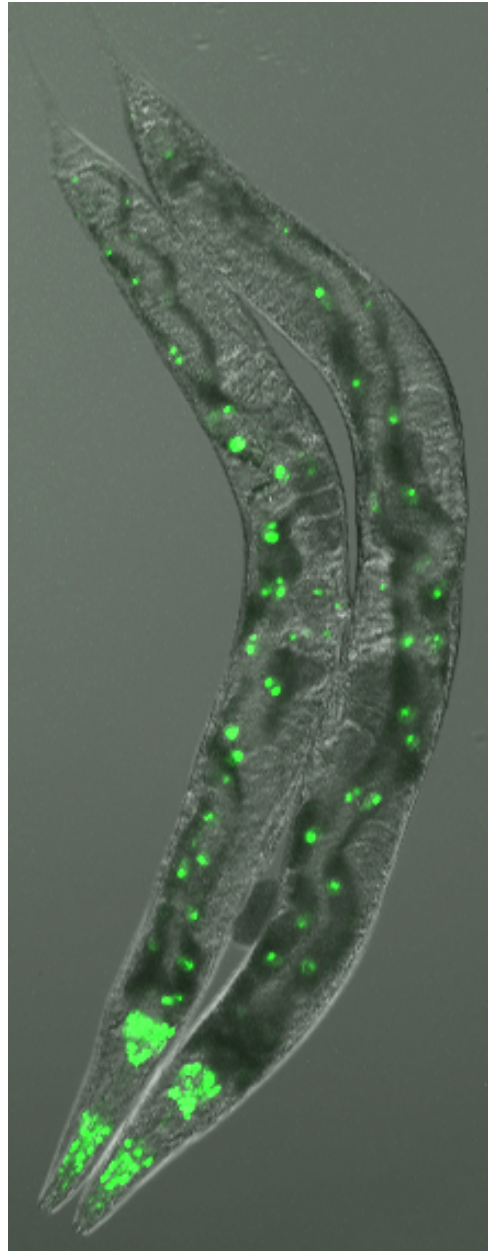

JF88(*mtEx63*)  
400  $\mu$ M zinc  
24 hour exposure

Supplement: supp_123_12_2124__3.pdf [file supp_123_12_2124__3.pdf]

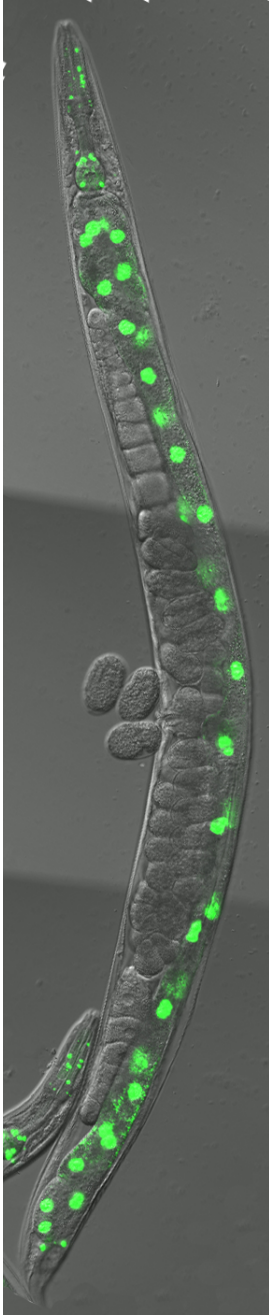

Open vector  
*JF88(mtEx63)*  
100  $\mu$ M cadmium

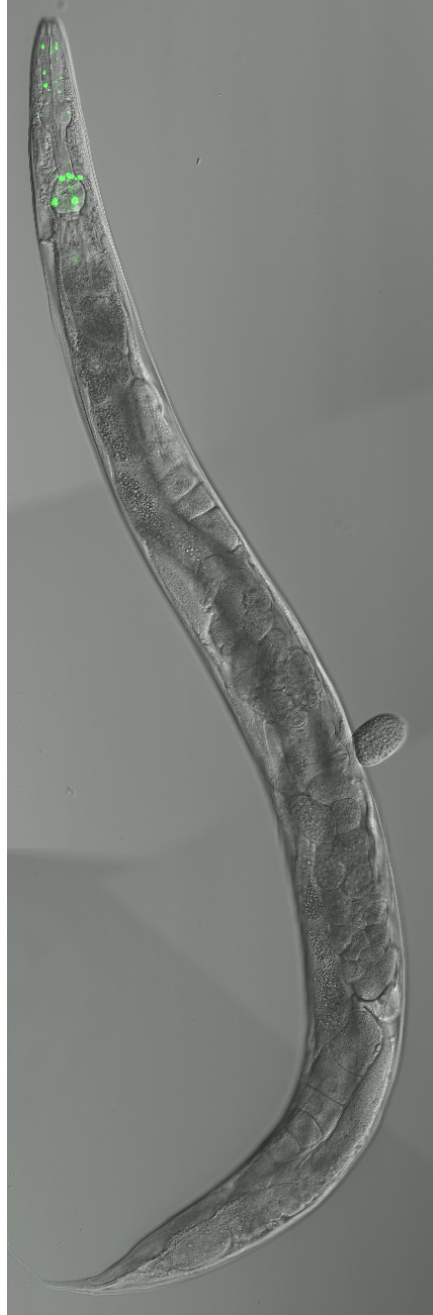

RNAi *numr-1/-2*  
*JF88(mtEx63)*  
100  $\mu$ M cadmium

Supplement: supp_123_12_2124__4.pdf [file supp_123_12_2124__4.pdf]

HSF-1-mCherry

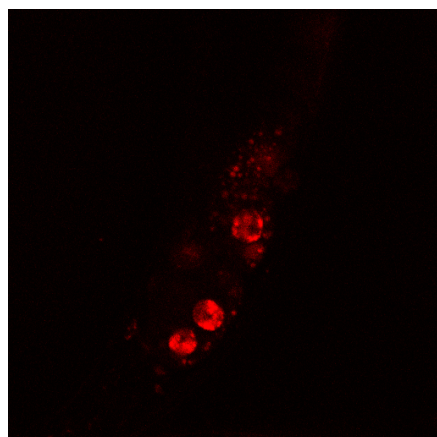

NUMR-1-GFP

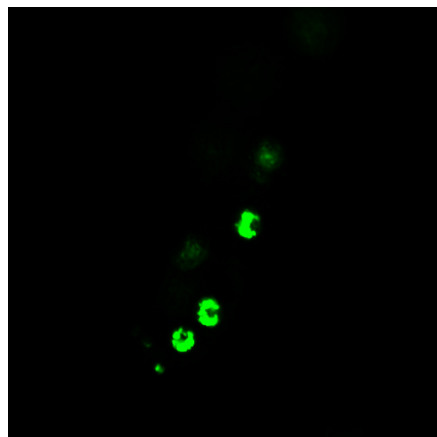

DIC

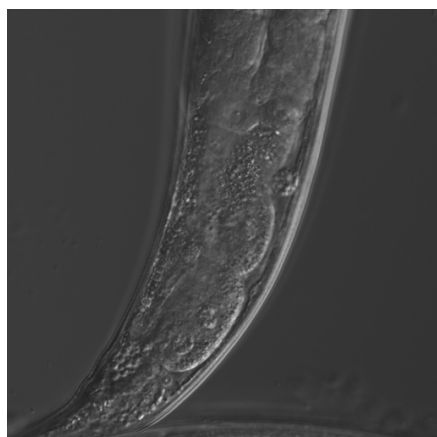

Merge

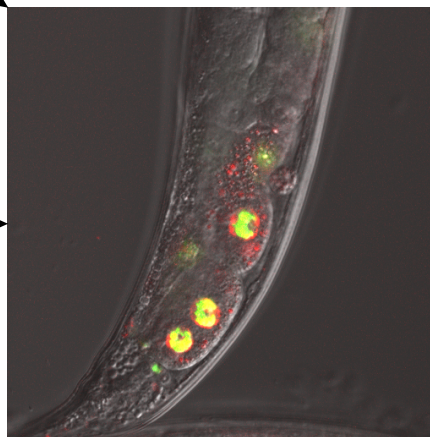

Supplement: supp_123_12_2124__5.pdf [file supp_123_12_2124__5.pdf]
